# Supplementary material
Source: publisher figshare collection journal article supplement (https://karger.figshare.com/articles/dataset/_/5126146)
Supplement: Supplementary file 1 [file 1]

Table S1.

Hardy–Weinberg equilibrium values for all the genotypes of rs10033900

| Genotype             | Controls(N%) | nAMD(N%)  | PCV(N%)   | Combined AMD(N%) |
|----------------------|--------------|-----------|-----------|------------------|
| CC                   | 35(11.7)     | 32(10.7)  | 29(9.7)   | 61(10.2)         |
| CT                   | 138(46.2)    | 141(47.0) | 142(47.7) | 283(47.3)        |
| TT                   | 126(42.1)    | 127(42.3) | 127(42.6) | 254(42.5)        |
| Total                | 299          | 300       | 298       | 598              |
| P(HWE <sup>*</sup> ) | 0.956        | 0.723     | 0.529     | 0.384            |

\* HWE, Hardy–Weinberg equilibrium.

Table S2.

Hardy–Weinberg equilibrium values for all the genotypes of rs2285714

| Genotype             | Controls(N%) | nAMD(N%)  | PCV(N%)   | Combined AMD(N%) |
|----------------------|--------------|-----------|-----------|------------------|
| TT                   | 11(3.7)      | 20(6.7)   | 11(3.7)   | 31(5.2)          |
| CT                   | 121(40.5)    | 92(30.7)  | 110(36.7) | 202(33.7)        |
| CC                   | 167(55.8)    | 188(62.6) | 179(59.6) | 367(61.1)        |
| Total                | 299          | 300       | 300       | 600              |
| P(HWE <sup>*</sup> ) | 0.152        | 0.183     | 0.496     | 0.897            |

\* HWE, Hardy–Weinberg equilibrium.

Table S3. Results of power calculation

|     |      | OR    |       |       |       |       |
|-----|------|-------|-------|-------|-------|-------|
|     |      | 0.5   | 0.6   | 0.7   | 0.8   | 0.9   |
| MAF | 0.2  | 93.8% | 76.7% | 49.3% | 23.9% | 9.3%  |
|     | 0.25 | 97.0% | 83.5% | 55.9% | 27.2% | 10.0% |
|     | 0.3  | 98.5% | 88.0% | 61.1% | 29.9% | 10.6% |
|     | 0.35 | 99.2% | 90.9% | 65.1% | 32.0% | 11.0% |
|     | 0.4  | 99.5% | 92.8% | 68.0% | 33.6% | 11.3% |
|     | 0.45 | 99.7% | 94.0% | 69.9% | 34.6% | 11.5% |
